# Supplementary material
Source: Springer Nature journal article supplement (https://www.springermedizin.de/resource/supplementary/12884_2013_1001_MOESM9_ESM.pdf/9458742)
Supplement: MOESM9 [file 9458742]

**TABLE 4.** SINGLE BIRTH 37-42 (WP) CAESAREAN AND INSTRUMENTAL VAGINAL BIRTH ASSOCIATION WITH VOLUM STRATUM, TYPE OF FUNDING AND MATERNAL AGE

|                                   | <u>Maternal age</u> |                 |                | <u>Type of financing</u> |                 |                | <u>Volume-stratum</u> |                 |                |
|-----------------------------------|---------------------|-----------------|----------------|--------------------------|-----------------|----------------|-----------------------|-----------------|----------------|
|                                   | <u>OR</u>           | <u>CI (95%)</u> | <u>p value</u> | <u>OR</u>                | <u>CI (95%)</u> | <u>p value</u> | <u>OR</u>             | <u>CI (95%)</u> | <u>p value</u> |
| <b>Caesarean section</b>          | 1,043               | 1,039-1,047     | 0,000          | 2,014                    | 1,940-2,090     | 0,000          | 0,976                 | 0,957-0,995     | 0,015          |
| <b>Instrumental vaginal birth</b> | 0,98                | 0,976-0,984     | 0,000          | 1,442                    | 1,377-1,510     | 0,000          | 1,016                 | 0,992-1,040     | 0,198          |
